# Supplementary material
Source: publisher figshare collection journal article supplement (https://acs.figshare.com/ndownloader/files/3820141)
Supplement: Supplementary file 1 [file 3820141]

## **Supporting Information**

### **Title:**

Probing Adsorption of Weak Acids on Graphite Using Amplitude Modulation-Frequency Modulation Atomic Force Microscopy

### **Authors:**

Ahmed M.A. Moustafa<sup>1,†</sup>, Jun Huang<sup>2,†</sup>, Kerry N. McPhedran<sup>1</sup>, Hongbo Zeng<sup>2,\*</sup> and Mohamed Gamal El-Din<sup>1,\*</sup>

<sup>†</sup>A.M.A. Moustafa and J. Huang contributed equally to this work.

### **Affiliation:**

<sup>1</sup>Department of Civil and Environmental Engineering, University of Alberta, Edmonton, Alberta, T6G 2W2, Canada

<sup>2</sup>Department of Chemical and Materials Engineering, University of Alberta, Edmonton, Alberta, T6G 2V4, Canada

### **\*Corresponding Author:**

E-mail: mgamalel-din@ualberta.ca; tel: 7804925124; fax: 7804920249; (M. Gamal El-Din); or

Email: hongbo.zeng@ualberta.ca; tel:7804921044; fax:7804922881. (Hongbo Zeng)

**Pages:** 3

**Figures:** 2

**Tables:** 0

## **XPS analysis**

The as received fresh peeled and treated HOPG were characterized away from the graphene steps to monitor the development of oxygenated groups at a depth = 2–5 mm. The analytical chamber was sustained under  $3 \times 10^{-8}$  Pa and a monochromatic Al K $\alpha$  source ( $h\nu = 1486.6$  eV) was used at 210 W, while survey scans were collected for binding energies from 1100 to 0 eV with analyzer pass energy of 160 eV and a step of 0.4 eV. For high-resolution spectra, pass energy was 20 eV with a 0.1 eV step with no charge neutralization required for conducting samples.

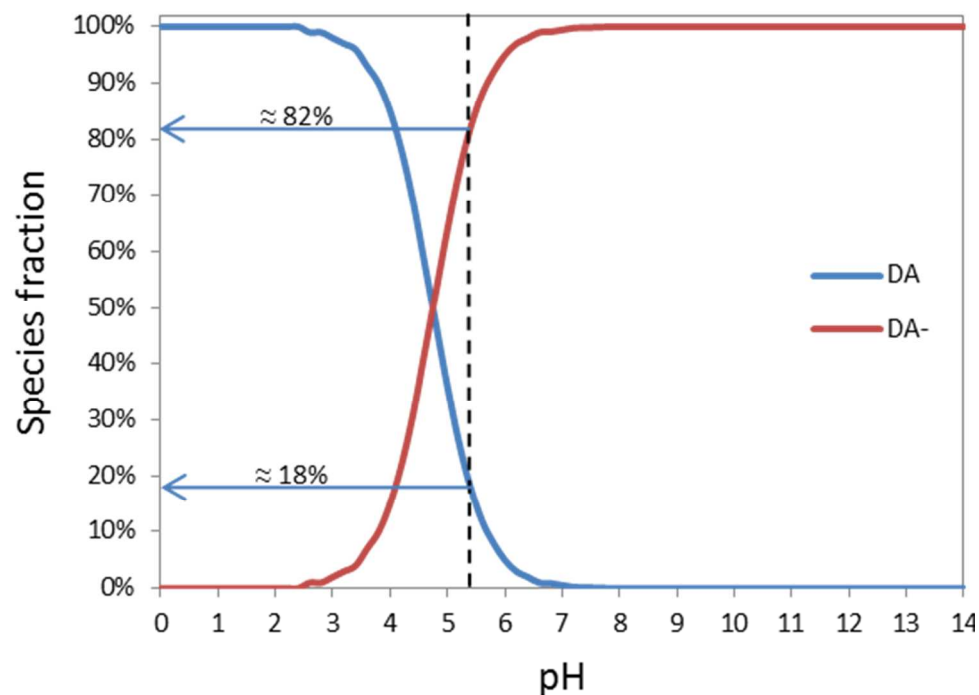

**Figure S1.** Speciation diagram for decanoic acid (according to the online SPARC software (<http://archemcalc.com/sparc/index>; accessed January 17<sup>th</sup>, 2014))

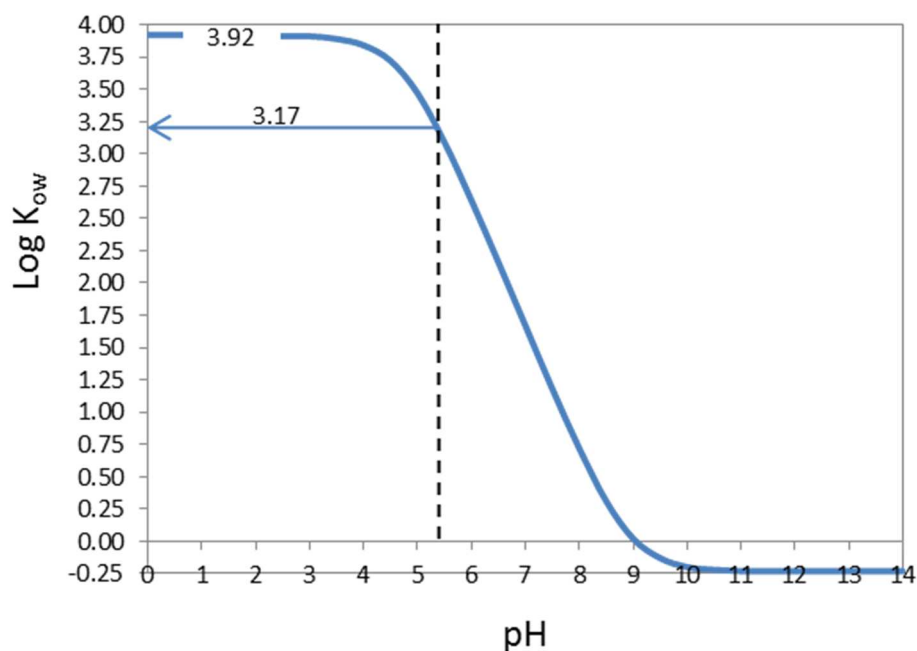

**Figure S2.** Log K<sub>ow</sub> values for decanoic acid at different pH (according to the online SPARC software (<http://archemcalc.com/sparc/index>; accessed January 17<sup>th</sup>, 2014))
